# Supplementary material for: Diverse Effects of Lead Nitrate on the Proliferation, Differentiation, and Gene Expression of Stem Cells Isolated from a Dental Origin
Source: Hindawi journal article supplement (doi:10.1155/2014/235941), 2014-01-01
Supplement: f1 [file 235941.f1.pdf]

Table 1: List of primers used in this study

| No | Gene           | Forward and Reverse Primers<br>(Forward and Reverse)                 | Annealing<br>Temperature<br>(°C) | Base<br>Pairs<br>(bp) | Accession<br>Number |
|----|----------------|----------------------------------------------------------------------|----------------------------------|-----------------------|---------------------|
| 1  | RAD51          | F: 5'-TTTGGAGAATTCCGAACT-3'<br>R: 5'-AGGAAGACAGGGAGAGTC-3'           | 58.5                             | 588                   | NM_002875.3         |
| 2  | XRCC4          | F:5'-AAGATGTCTCATTGAGACTTG-3'<br>R:5'-CCGCTTATAAAGATCAGTCTC-3'       | 53.5                             | 233                   | NM_022550.2         |
| 3  | ERCC3          | F:5'-CCAGGAAGCGGCACTATGAGG-3'<br>R:5'-GGTCGTCCTTCAGCGGCATTT-3'       | 63                               | 171                   | NM_000122.1         |
| 4  | NANOG          | F:5'-TCCTCCATGGATCTGCTTATTCA-3'<br>R:5'-CAGGTCTTCACCTGTTTGTAGCTGAG3' | 59                               | 260                   | NM_024865.2         |
| 5  | REX1           | F:5'-GCGTACGCAAATTAAGTCCAGA-3'<br>R:5'-ATCCTAAACAGCTCGCAGAAT-3'      | 55                               | 302                   | NM_174900.3         |
| 6  | Oct-04         | F:5'-CGACCATCTGCCGCTTTGAG-3'<br>R:5'-AAACCCTGGCACAACCTCCA-3'         | 61                               | 619                   | NM_203289.3         |
| 7  | HNF-4 $\alpha$ | F:5'-GCTTGGTTCTCGTTGAGTGG-3'<br>R:5'-CAGGAGCTTATAGGGCTCAGAC-3'       | 58                               | 762                   | NM_178850.1         |
| 8  | SOX 17         | F:5'-CGCACGGAATTTGAACAGTA-3'<br>R:5'-GGATCAGGGACCTGTCACAC-3'         | 58                               | 146                   | NM_022454.3         |
| 9  | SOX 1          | F:5'-AAAACGAGGCGAGAGGCGAA-3'<br>R:5'-TGCCCTGGTCTTTGTCCTTCATCC-3'     | 62                               | 896                   | NM_005986.2         |
| 11 | KRT15          | F:5'-CACAGTCTGCTGAGGTTGGA-3'<br>R:5'-GAGCTGCTCCATCTGTAGGG-3'         | 60                               | 196                   | NM_002275.3         |
| 12 | NURR1          | F:5'-CGGACAGCAGTCCTCCATTAAGGT-3'<br>R:5'-CTGAAATCGGCAGTACTGACAGCG-3' | 58                               | 711                   | NM_006186.3         |
