# Supplementary material for: Diverse Effects of Lead Nitrate on the Proliferation, Differentiation, and Gene Expression of Stem Cells Isolated from a Dental Origin
Source: Hindawi journal article supplement (doi:10.1155/2014/235941), 2014-01-01

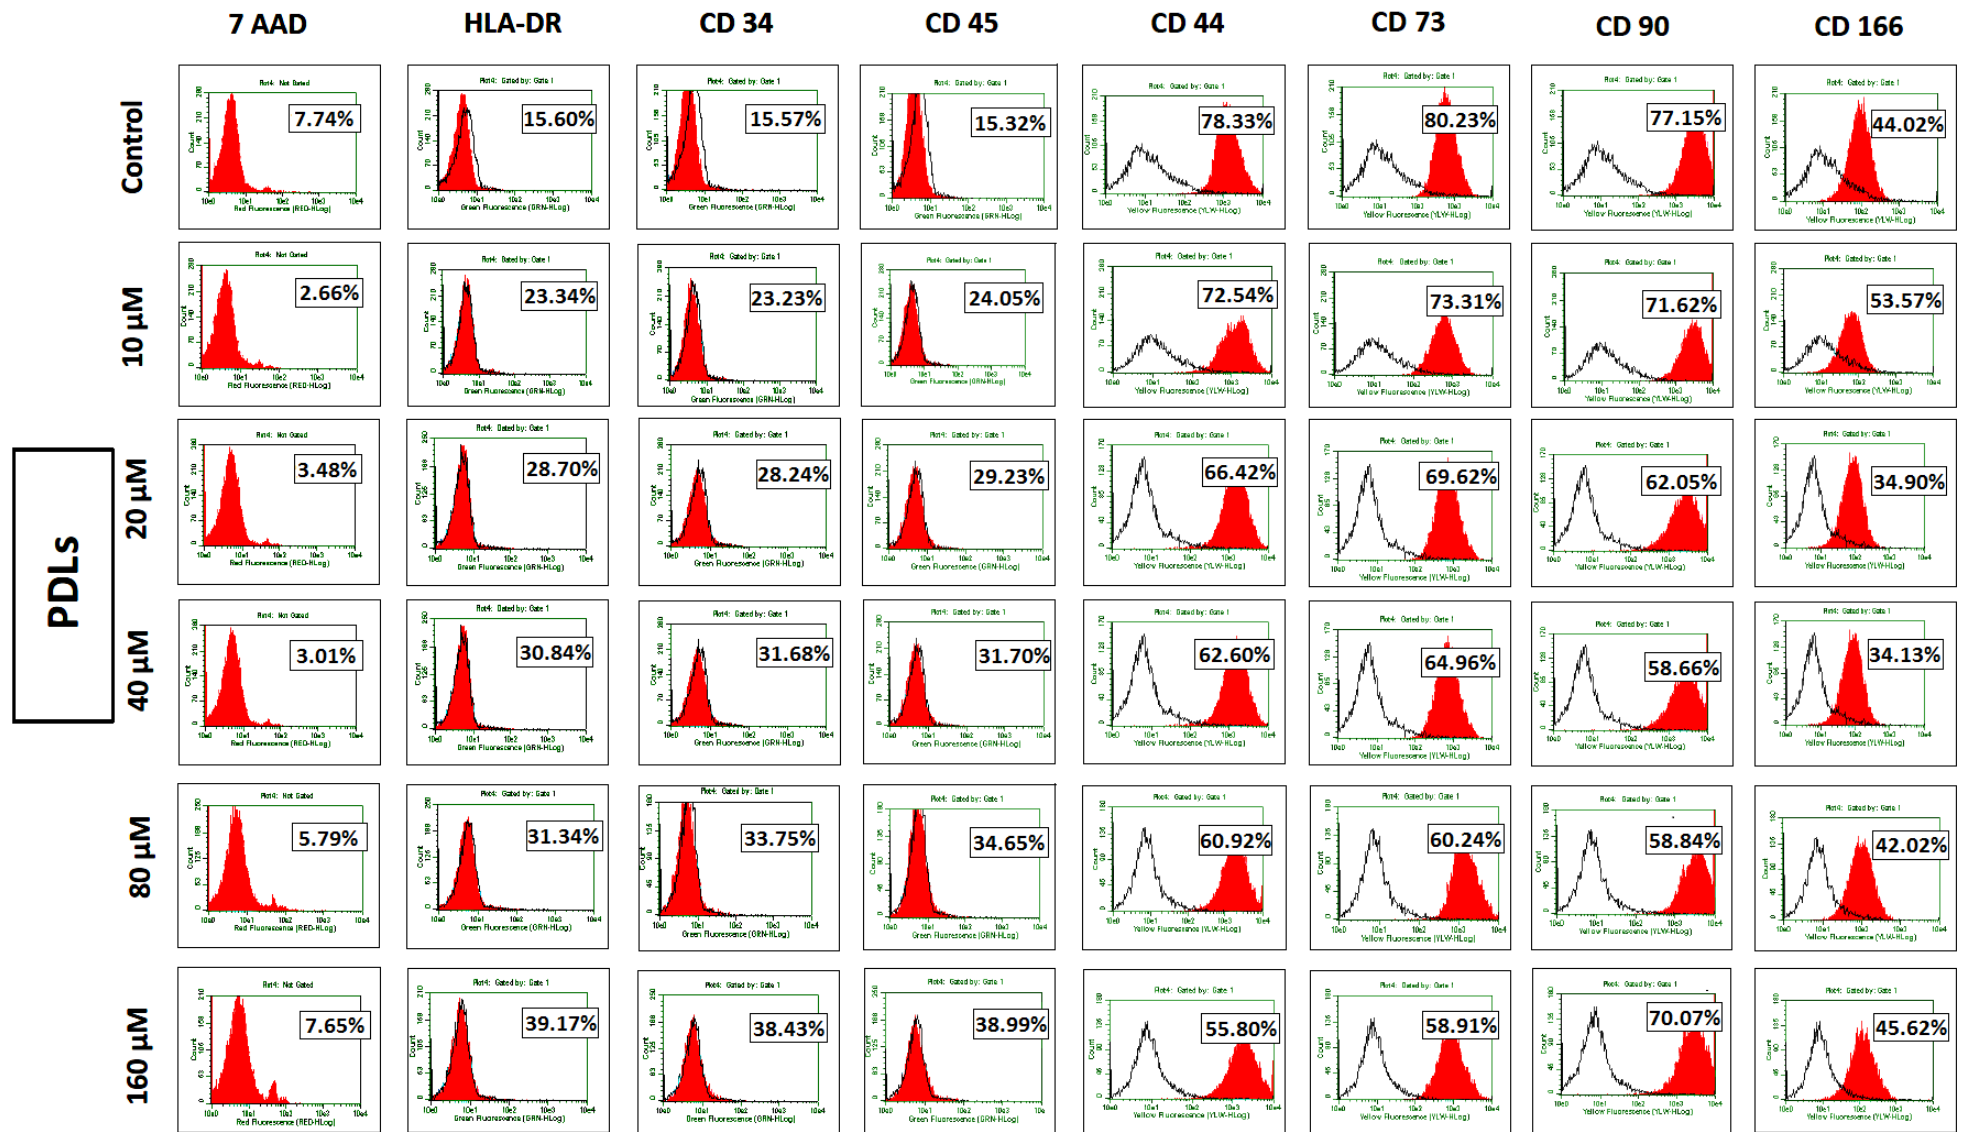

Supplement: f5 [file 235941.f5.pdf]
